# Supplementary material
Source: PubMed Central journal article supplement (PMC6727645)
Supplement: NIHMS1036211-supplement-1.pdf [file NIHMS1036211-supplement-1.pdf]

## Supporting information

### **Native reversed-phase liquid chromatography: a technique for LCMS of intact antibody-drug conjugates**

Tse-Hong Chen<sup>1</sup>, Yun Yang<sup>1</sup>, Zhaorui Zhang<sup>2</sup>, Cexiong Fu<sup>2Δ</sup>, Qunying Zhang<sup>2</sup>, Jon D. Williams<sup>3</sup>, Mary J. Wirth<sup>1,\*</sup>

1. Purdue University, Department of Chemistry, 560 Oval Drive, West Lafayette, IN 47907, USA

2. Process Analytical Chemistry, AbbVie, Inc. 1401 Sheridan Road, North Chicago, IL 60064, USA

3. Discovery Structural Chemistry, AbbVie, Inc. 1401 Sheridan Road, North Chicago, IL 60064, USA

Δ. Currently at Shire Plc. Lexington, MA 02421

#### Contents.

- 1) Conditions for conventional chromatography in Figure 2 of the paper.....Page 2
- 2) Figure S1a. RPLC Chromatogram for AbbVie model ADC after reduction with DTT.....Page 2
- 3) Figure S1b. Raw mass spectra (right) and deconvoluted mass spectra (left) for each peak in the chromatograms of part a..... Page 3
- 4) Figure S2. ADC is not fully eluted with a commercial HIC column under nRPLC conditions.  
.....Page 4

Conditions for LC in Figure 2.

**b)** RPLC of the denatured model ADC after reduction with DTT, showing the expected mAb subunits resolved in six peaks, using a commercial RPLC column. Column: Thermo MabPac RP, 2.1 x 50 mm, 4  $\mu$ m, supermacroporous polymer particles, A: H<sub>2</sub>O + 0.1% DFA, B: ACN + 0.1% DFA, Gradient: 27-42% B/15min, Q: 200  $\mu$ L/min at 80 °C, Injection: 10  $\mu$ g, Detection: 280 nm. **c)** RPLC of the model ADC without DTT denaturing, with assignments based on mass spectra. Column: Supelco Bioshell A400 Protein C4 column, 2.1 x 100 mm, 3.4  $\mu$ m, 400 Å pores particles, A: H<sub>2</sub>O + 0.1% FA and 0.015%TFA, B: ACN + 0.1% FA and 0.015%TFA, Gradient: 10% B/1min, 31-48% B/13min, Q: 300  $\mu$ L/min at 70 °C, Injection: 0.5  $\mu$ g, Detection: 280 nm. **d)** HIC of the intact ADC using Thermo-HIC butyl column for conventional HIC gradient of A: 50 mM Na<sub>3</sub>PO<sub>4</sub>, 1 M (NH<sub>4</sub>)<sub>2</sub>SO<sub>4</sub>, pH 7, B: 50 mM Na<sub>3</sub>PO<sub>4</sub>, 30% IPA, pH 7, Gradient: 0-100 %B / 15 min, 100 %B / 5 min, flow rate: 1,000  $\mu$ L/min at 30 °C and 2  $\mu$ g injected, in both cases.

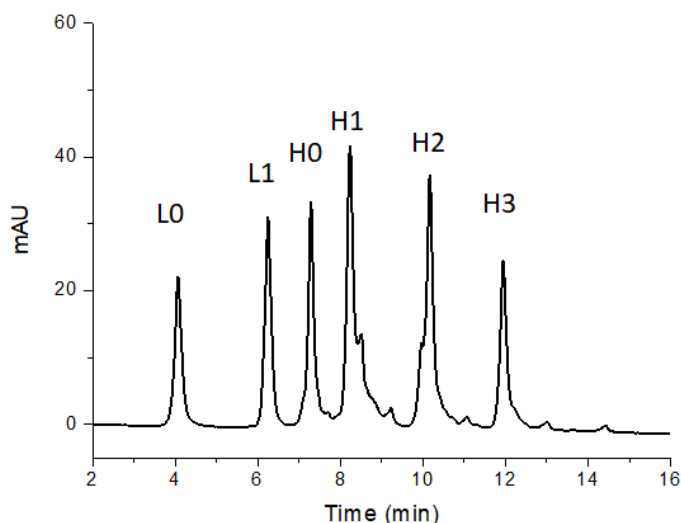

Figure S1. RPLC Chromatogram for AbbVie model ADC after reduction with DTT. Thermo MabPac RP; A: H<sub>2</sub>O + 0.1% DFA, B: ACN + 0.1% DFA; Gradient: 27-42% B/15min; Fc: 200  $\mu$ L/min at 80 °C; Injection: 10  $\mu$ g; Detection, 280 nm.

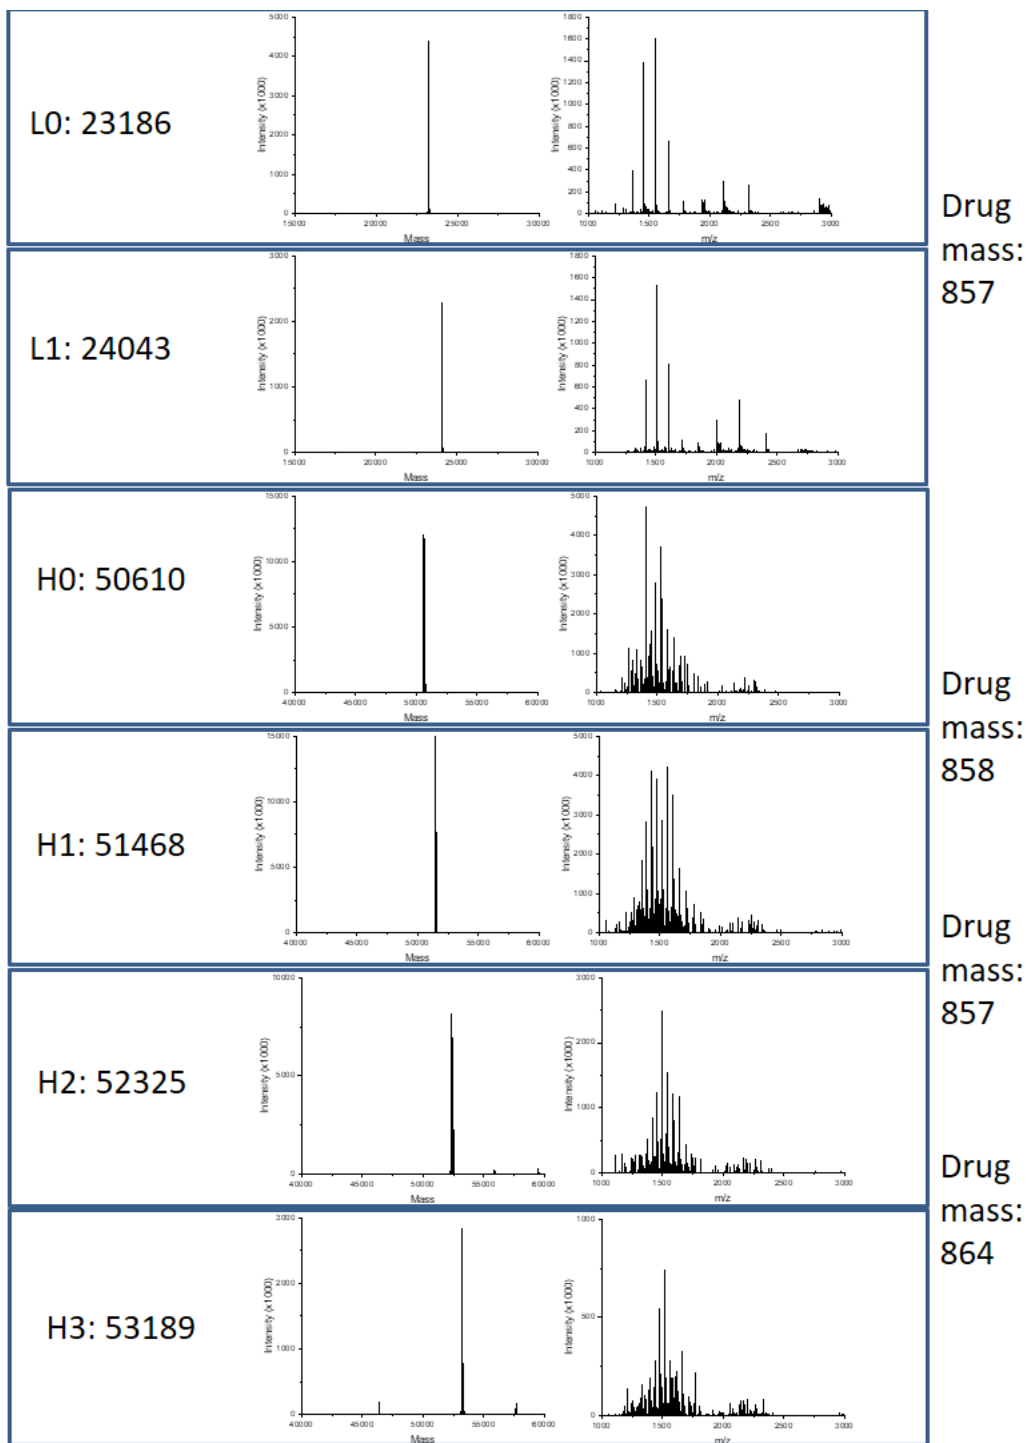

Figure S1 b) Raw mass spectra (right) and deconvoluted mass spectra (left) for each peak in the chromatograms of part a.

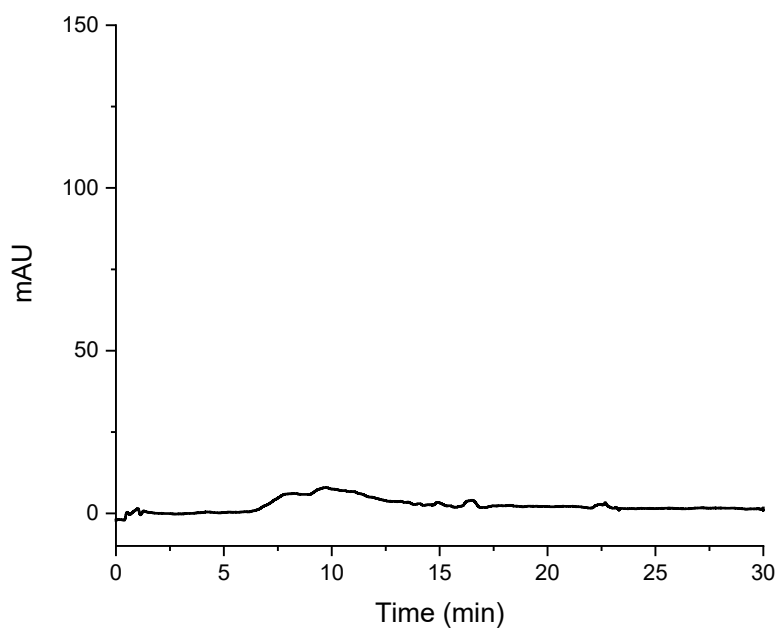

Figure S2. ADC is not fully eluted with a commercial HIC column under nRPLC conditions. Column: Thermo HIC butyl, model ADC. Gradient: A: 50 mM **NH<sub>4</sub>OAc**, pH 7, B: 50 mM **NH<sub>4</sub>OAc**, 50% IPA, pH 7; Gradient: 0-100 %B/15 min, followed by 100 %B/5 min; Flow rate: 1,000  $\mu$ L/min, 30  $^{\circ}$ C. Wavelength: 280 nm.
